# Supplementary material for: Relationship between De Ritis and clinical outcomes in patients with aneurysmal subarachnoid hemorrhage: Insights from the LongTEAM registry
Source: Research Square preprint supplement (doi:10.21203/rs.3.rs-4995063/v1), 2024-10-22
Supplement: Supplementary file 1 [file e442395cc27c420949fefbde.docx]

Supplemental Table 1. Definitions of in-hospital complications.

| **In-hospital complications** | **Definitions** |
| --- | --- |
| Rebleeding | Sudden clinical deterioration occurring during postoperative hospital stay with signs of increased bleeding on serial CT scans. |
| Delayed cerebral ischemia | New focal neurological deficit or global neurological deterioration (a drop of ≥ 2 points on the Glasgow Coma Scale [GCS]) lasting > 2 hours, after exclusion of intracranial hemorrhage, hydrocephalus, seizures, metabolic derangements, and infection, with or without radiological signs of cerebral vasospasm. |
| Seizures | Clinical diagnosis of focal and/or generalized seizure in a previously nonepileptic patient. |
| Intracranial infection | (1) The patient had clinical manifestations of various intracranial infections such as postoperative fever, headache, or neck stiffness. (2) The patient’s cerebrospinal fluid test showed inflammatory index changes, which met one of the following: white blood cell count > 0.01 × 109 /L; cerebrospinal fluid protein > 4.50 g/L; cerebrospinal fluid glucose < 2.50 mmol/L. (3) The peripheral blood white blood cell count was > 10 × 109 /L. |
| Major adverse cardiac event | The composite of total death; myocardial infarction; stroke, hospitalization because of heart failure; and revascularization, including percutaneous coronary intervention, and coronary artery bypass graft. |
| Stress ulcer bleeding | No previous history of peptic ulcer or peptic hemorrhage, and after treatment for aSAH, patients were tested positive by fecal occult blood test. |
| Abnormal hepatic function | Liver function-related laboratory abnormalities. |
| Urinary tract infection | Clinical symptoms of urinary tract infection or positive urine culture. |
| Anemia | In men, a hemoglobin of less than 130 to 140 g/L (13 to 14 g/dL); in women, it is less than 120 to 130 g/L (12 to 13 g/dL). |
| Hypoproteinemia | Total protein < 60g/L or albumin < 30g/L. |
| Pneumonia | Description of clinical indications or positive chest radiograph. |
| Deep vein thrombosis | Clinical diagnosis of deep vein thrombosis supported by ultrasound or venography. |
| Electrolyte disturbance | Hypernatremia, hyperkalemia, hyperchloremia, hyponatremia, hypokalemia, hypochloremia. |
| Disorders of lipoprotein metabolism | Increased levels of plasma cholesterol and/or triglycerides or decreased levels of HDL-C cholesterol |

| Supplemental Table 2. Laboratory examination items reference ranges. | | |
| --- | --- | --- |
| Items | Reference range | Units |
| WBC | 3.5-9.5 | 10E9/L |
| ALT | 0-41.0 | IU/L |
| AST | 0-42.0 | IU/L |
| Total Protein | 60.0-80.0 | g/L |
| Albumin | 35.0-55.0 | g/L |
| Globulin | 20.0-30.0 | g/L |
| Total bilirubine | 3.40-20.50 | μmol/L |
| Total cholesterol | 3.20-5.17 | mmol/L |
| Triglyceride | 0.50-1.70 | mmol/L |
| HDL | 1.00-1.80 | mmol/L |
| LDL | 1.50-3.10 | mmol/L |
| Apoprotein A1 | 1.20-1.80 | g/L |
| Apoprotein B | 0.60-1.14 | g/L |
| *WBC* white blood cell; AST aspartate aminotransferase; ALT alanine aminotransferase; HDL high-density lipoprotein; LDL low-density lipoprotein. | | |

| Supplemental Table 3. Baseline characteristics between included and excluded patients. | | | |  |
| --- | --- | --- | --- | --- |
|  | Total | Included | Excluded | *P* value |
| No. of the patients | 1268 | 1098 | 170 |  |
| De Ritis, median (IQR) | 1.22 (0.91-1.60) | 1.20 (0.89-1.58) | 1.30 (1.00-1.72) | **0.006** |
| Age, median (IQR), y | 55 (48-63) | 55 (48-63) | 55 (47-63) | 0.823 |
| Age > 55 years old, n (%) | 611 (48.2) | 532 (48.5) | 79 (46.5) | 0.680 |
| BMI, median (IQR), kg/m^2 | 24.49 (22.77-27.04) | 24.65 (22.83-27.06) | 24.22 (22.40-26.57) | 0.123 |
| Female, n (%) | 749 (59.1) | 646 (58.8) | 103 (60.6) | 0.676 |
| Current smoking, n (%) | 292 (23.0) | 272 (24.8) | 20 (11.8) | **<0.001** |
| Current alcohol drinking, n (%) | 217 (17.1) | 202 (18.4) | 15 (8.8) | **0.002** |
| Medical History, n (%) |  |  |  |  |
| Hypertension | 723 (57.0) | 642 (58.5) | 81 (47.6) | **0.010** |
| Diabetes mellitus | 104 (8.2) | 95 (8.7) | 9 (5.3) | 0.175 |
| Hyperlipidemia | 86 (6.8) | 81 (7.4) | 5 (2.9) | **0.032** |
| Stroke | 92 (7.3) | 88 (8.0) | 4 (2.4) | **0.010** |
| Heart diseases | 216 (17.0) | 191 (17.4) | 25 (14.7) | 0.443 |
| Admission status |  |  |  |  |
| Loss of consciousness, n (%) | 343 (27.1) | 337 (30.7) | 6 (3.5) | **<0.001** |
| WFNS 4-5, n (%) | 286 (22.6) | 244 (22.2) | 42 (24.7) | 0.490 |
| mFS 3-4, n (%) | 895 (70.6) | 775 (70.6) | 120 (70.6) | >0.999 |
| Hydrocephalus, n (%) | 499 (39.4) | 431 (39.3) | 68 (40.0) | 0.866 |
| Graeb score 5-12, n (%) | 103 (8.1) | 90 (8.2) | 13 (7.6) | >0.999 |
| SEBES 3-4, n (%) | 599 (47.2) | 522 (47.5) | 77 (45.3) | 0.621 |
| Aneurysm at posterior circulation, n (%) | 134 (10.6) | 114 (10.4) | 20 (11.8) | 0.592 |
| Surgical clipping, n (%) | 677 (53.4) | 582 (53.0) | 95 (55.9) | 0.509 |
| *IQR* interquartile range; *BMI* body mass index; *WFNS* World Federation of Neurological Societies Scale; *mFS* modified Fisher Scale; *SEBES* Subarachnoid Hemorrhage Early Brain Edema Score; *AST* aspartate aminotransferase; *ALT* alanine aminotransferase; *De Ritis* AST/ALT ratio; *HDL* high-density lipoprotein; *LDL* low-density lipoprotein. | | | | |

| Table S4. Associations of De Ritis with poor functional outcomes at discharge and 3 months follow-up excluding participants with De Ritis > 2. | | | | | | | | |
| --- | --- | --- | --- | --- | --- | --- | --- | --- |
| Outcomes | Total n = 985 | Quartiles of De Ritis | | | | *P* for trend | Binary classification | |
| Q1 n = 245 | Q2 n = 246 | Q3 n = 244 | Q4 n = 250 | <1 n = 360 | ≥1 n = 625 |
| Death at discharge | | | | | | | | |
| n (%) | 11 (1.1) | 0 (0) | 2 (0.8) | 2 (0.8) | 7 (2.8) |  | 2 (0.6) | 9 (1.4) |
| Unadjusted |  | Ref. | - | - | - | **0.009** | Ref. | 2.615 (0.562-12.171) |
| Model 1 |  | Ref. | - | - | - | **0.013** | Ref. | 2.200 (0.464-10.440) |
| Model 2 |  | Ref. | - | - | - | 0.053 | Ref. | 1.015 (0.174-5.926) |
| Model 3 |  | Ref. | - | - | - | 0.106 | Ref. | 0.550 (0.073-4.160) |
| mRS 3-6 at discharge | | | | | | | | |
| n (%) | 398 (40.4) | 92 (37.6) | 86 (35.0) | 96 (39.3) | 124 (49.6) |  | 127 (35.3) | 271 (43.4) |
| Unadjusted |  | Ref. | 0.894 (0.619-1.292) | 1.079 (0.749-1.553) | **1.637 (1.144-2.342)** | **0.003** | Ref. | **1.404 (1.074-1.836)** |
| Model 1 |  | Ref. | 0.742 (0.506-1.087) | 0.841 (0.574-1.233) | 1.274 (0.876-1.852) | 0.108 | Ref. | 1.173 (0.887-1.552) |
| Model 2 |  | Ref. | **0.638 (0.412-0.986)** | 0.708 (0.456-1.099) | 0.985 (0.638-1.521) | 0.851 | Ref. | 0.932 (0.675-1.288) |
| Model 3 |  | Ref. | **0.590 (0.378-0.920)** | 0.652 (0.416-1.024) | 0.930 (0.595-1.454) | 0.943 | Ref. | 0.881 (0.633-1.227) |
| mRS 4-6 at discharge | | | | | | | | |
| n (%) | 199 (20.2) | 46 (18.8) | 41 (16.7) | 44 (18.0) | 68 (27.2) |  | 61 (16.9) | 138 (22.1) |
| Unadjusted |  | Ref. | 0.856 (0.544-1.376) | 0.952 (0.602-1.504) | **1.616 (1.057-2.472)** | **0.015** | Ref. | 1.389 (0.995-1.940) |
| Model 1 |  | Ref. | 0.781 (0.487-1.254) | 0.830 (0.517-1.331) | 1.371 (0.884-2.128) | 0.087 | Ref. | 1.244 (0.882-1.755) |
| Model 2 |  | Ref. | 0.581 (0.334-1.010) | 0.603 (0.345-1.054) | 0.889 (0.525-1.507) | 0.896 | Ref. | 0.884 (0.585-1.334) |
| Model 3 |  | Ref. | **0.535 (0.304-0.941)** | **0.512 (0.286-0.915)** | 0.800 (0.463-1.380) | 0.600 | Ref. | 0.787 (0.514-1.204) |
| Death at 90 days | | | | | | | | |
| n (%) | 18 (1.8) | 1 (0.4) | 3 (1.2) | 5 (2.0) | 9 (3.6) |  | 3 (0.8) | 15 (2.4) |
| Unadjusted |  | Ref. | 3.012 (0.311-29.162) | 5.105 (0.592-44.017) | **9.112 (1.146-72.474)** | **0.009** | Ref. | 2.926 (0.841-10.177) |
| Model 1 |  | Ref. | 2.506 (0.257-24.469) | 3.907 (0.446-34.226) | 7.336 (0.909-56.197) | **0.017** | Ref. | 2.427 (0.688-8.568) |
| Model 2 |  | Ref. | 1.903 (0.185-19.589) | 2.446 (0.261-22.957) | 3.859 (0.449-33.140) | 0.137 | Ref. | 1.240 (0.319-4.828) |
| Model 3 |  | Ref. | 1.910 (0.177-20.662) | 2.171 (0.225-20.989) | 3.236 (0.368-28.421) | 0.226 | Ref. | 0.965 (0.237-3.921) |
| mRS 3-6 at 90 days | | | | | | | | |
| n (%) | 181 (18.4) | 30 (12.2) | 44 (17.9) | 43 (17.6) | 64 (25.6) |  | 49 (13.6) | 132 (21.1) |
| Unadjusted |  | Ref. | 1.561 (0.945-2.580) | 1.533 (0.926-2.539) | **2.466 (1.532-3.969)** | **<0.001** | Ref. | **1.699 (1.189-2.429)** |
| Model 1 |  | Ref. | 1.278 (0.763-2.143) | 1.145 (0.678-1.933) | **1.822 (1.112-2.987)** | **0.019** | Ref. | 1.358 (0.937-1.968) |
| Model 2 |  | Ref. | 1.232 (0.696-2.181) | 1.054 (0.589-1.884) | 1.364 (0.781-2.380) | 0.341 | Ref. | 1.093 (0.717-1.665) |
| Model 3 |  | Ref. | 1.166 (0.652-2.086) | 0.944 (0.519-1.717) | 1.249 (0.704-2.215) | 0.537 | Ref. | 0.968 (0.627-1.495) |
| mRS 4-6 at 90 days | | | | | | | | |
| n (%) | 110 (11.2) | 13 (5.3) | 29 (11.8) | 27 (11.1) | 41 (16.4) |  | 27 (7.5) | 83 (13.3) |
| Unadjusted |  | Ref. | **2.385 (1.208-4.707)** | **2.220 (1.117-4.414)** | **3.501 (1.825-6.715)** | **<0.001** | Ref. | **1.889 (1.198-2.977)** |
| Model 1 |  | Ref. | 1.919 (0.961-3.833) | 1.600 (0.791-3.236) | **2.548 (1.307-4.965)** | **0.011** | Ref. | 1.473 (0.922-1.492) |
| Model 2 |  | Ref. | 1.892 (0.904-3.958) | 1.486 (0.696-3.170) | 1.885 (0.912-3.897) | 0.187 | Ref. | 1.134 (0.674-1.908) |
| Model 3 |  | Ref. | 1.830 (0.862-3.883) | 1.280 (0.587-2.789) | 1.710 (0.813-3.598) | 0.325 | Ref. | 0.950 (0.555-1.625) |

ORs with 95% CIs were calculated using Logistic regression model.

Model 1: adjusted for age (continuous variable) and sex.

Model 2: adjusted for variables in model 1, body mass index, current smoking, current alcohol drinking, medical history (hypertension, diabetes mellitus, dyslipidemia, stroke, heart disease), WFNS , mFS, aneurysm location and treatment modality.

Model 3: adjusted for variables in model 2, plus preoperative WBC count, total cholesterol, triglyceride, high-density lipoprotein, and low-density lipoprotein.

Bold indicate statistical significance.

WFNS World Federation of Neurological Societies Scale; mFS modified Fisher Scale; WBC white blood cell; mRS modified Rankin Scale;

| Table S5. Associations of De Ritis with in-hospital complications excluding participants with De Ritis > 2. | | | | | | | | |
| --- | --- | --- | --- | --- | --- | --- | --- | --- |
| Outcomes | Total n = 985 | Quartiles of De Ritis | | | | *P* for trend | Binary classification | |
| Q1 n = 245 | Q2 n = 246 | Q3 n = 244 | Q4 n = 250 | <1 n = 360 | ≥1 n = 625 |
| Intracranial infection | | | | | | | | |
| n (%) | 121 (12.) | 26 (10.6) | 24 (9.8) | 32 (13.1) | 39 (15.6) |  | 37 (10.3) | 84 (13.4) |
| Unadjusted |  | Ref. | 0.911 (0.507-1.635) | 1.271 (0.733-2.206) | 1.557 (0.915-2.648) | 0.051 | Ref. | 1.355 (0.899-2.044) |
| Model 1 |  | Ref. | 0.957 (0.529-1.730) | 1.377 (0.782-2.424) | 1.637 (0.948-2.824) | **0.036** | Ref. | 1.409 (0.925-2.146) |
| Model 2 |  | Ref. | 0.885 (0.471-1.662) | 1.180 (0.640-2.177) | 1.096 (0.605-1.983) | 0.282 | Ref. | 1.044 (0.660-1.652) |
| Model 3 |  | Ref. | 0.872 (0.464-1.641) | 1.152 (0.621-2.137) | 1.083 (0.593-1.978) | 0.629 | Ref. | 1.022 (0.642-1.628) |
| MACE | | | | | | | | |
| n (%) | 367 (37.3) | 81 (33.1) | 106 (43.1) | 95 (38.9) | 85 (34.0) |  | 129 (35.8) | 238 (38.1) |
| Unadjusted |  | Ref. | **1.533 (1.062-2.212)** | 1.291 (0.891-1.869) | 1.043 (0.718-1.515) | 0.884 | Ref. | 1.101 (0.841-1.441) |
| Model 1 |  | Ref. | 1.365 (0.938-1.985) | 1.088 (0.742-1.595) | 0.857 (0.582-1.261) | 0.223 | Ref. | 0.955 (0.723-1.263) |
| Model 2 |  | Ref. | **1.615 (1.062-2.456)** | 1.327 (0.863-2.039) | 1.012 (0.649-1.580) | 0.750 | Ref. | 1.193 (0.867-1.641) |
| Model 3 |  | Ref. | **1.664 (1.088-2.544)** | 1.382 (0.894-2.138) | 0.996 (0.632-1.568) | 0.729 | Ref. | 1.237 (0.893-1.714) |
| Stress ulcer bleeding | | | | | | | | |
| n (%) | 221 (22.4) | 61 (24.9) | 50 (20.3) | 52 (21.3) | 58 (23.2) |  | 81 (22.5) | 140 (22.4) |
| Unadjusted |  | Ref. | 0.769 (0.503-1.177) | 0.817 (0.536-1.245) | 0.911 (0.603-1.376) | 0.729 | Ref. | 0.994 (0.729-1.357) |
| Model 1 |  | Ref. | 0.698 (0.453-1.075) | 0.714 (0.462-1.102) | 0.784 (0.513-1.200) | 0.340 | Ref. | 0.899 (0.653-1.238) |
| Model 2 |  | Ref. | 0.670 (0.426-1.052) | 0.730 (0.462-1.152) | 0.767 (0.486-1.211) | 0.357 | Ref. | 0.933 (0.664-1.312) |
| Model 3 |  | Ref. | 0.687 (0.436-1.083) | 0.740 (0.466-1.174) | 0.762 (0.479-1.213) | 0.338 | Ref. | 0.949 (0.671-1.342) |
| Abnormal hepatic funciton | | | | | | | | |
| n (%) | 266 (27.0) | 84 (34.3) | 63 (25.6) | 58 (23.8) | 61 (24.4) |  | 114 (31.7) | 152 (24.3) |
| Unadjusted |  | Ref. | **0.660 (0.447-0.974)** | **0.598 (0.402-0.888)** | **0.619 (0.418-0.915)** | **0.015** | Ref. | **0.693 (0.520-0.925)** |
| Model 1 |  | Ref. | 0.682 (0.458-1.016) | **0.636 (0.422-0.959)** | **0.622 (0.415-0.933)** | **0.024** | Ref. | **0.707 (0.524-0.952)** |
| Model 2 |  | Ref. | **0.649 (0.428-0.986)** | **0.558 (0.361-0.863)** | **0.492 (0.317-0.764)** | **0.002** | Ref. | **0.599 (0.434-0.827)** |
| Model 3 |  | Ref. | **0.629 (0.411-0.960)** | **0.506 (0.324-0.792)** | **0.432 (0.274-0.680)** | **<0.001** | Ref. | **0.550 (0.395-0.766)** |
| UTI | | | | | | | | |
| n (%) | 31 (3.1) | 7 (2.9) | 10 (4.1) | 9 (3.7) | 5 (2.0) |  | 13 (3.6) | 18 (2.9) |
| Unadjusted |  | Ref. | 1.441 (0.539-3.848) | 1.302 (0.477-3.554) | 0.694 (0.217-2.217) | 0.520 | Ref. | 0.792 (0.383-1.635) |
| Model 1 |  | Ref. | 1.244 (0.460-3.363) | 1.053 (0.377-2.941) | 0.560 (0.172-1.826) | 0.287 | Ref. | 0.669 (0.318-1.406) |
| Model 2 |  | Ref. | 1.218 (0.439-3.378) | 1.120 (0.387-3.241) | 0.692 (0.204-2.351) | 0.534 | Ref. | 0.734 (0.337-1.598) |
| Model 3 |  | Ref. | 1.219 (0.439-3.388) | 1.165 (0.401-3.383) | 0.688 (0.201-2.357) | 0.546 | Ref. | 0.764 (0.349-1.675) |
| Anemia | | | | | | | | |
| n (%) | 326 (33.1) | 60 (24.5) | 72 (29.3) | 90 (36.9) | 104 (41.6) |  | 85 (23.6) | 241 (38.6) |
| Unadjusted |  | Ref. | 1.276 (0.855-1.904) | **1.802 (1.220-2.663)** | **2.196 (1.495-3.227)** | **<0.001** | Ref. | **2.030 (1.517-2.718)** |
| Model 1 |  | Ref. | 1.116 (0.739-1.685) | 1.488 (0.993-2.230) | **1.935 (1.298-2.885)** | **<0.001** | Ref. | **1.843 (1.363-2.492)** |
| Model 2 |  | Ref. | 1.065 (0.686-1.653) | 1.378 (0.890-2.135) | 1.459 (0.945-2.253) | 0.051 | Ref. | **1.510 (1.090-2.093)** |
| Model 3 |  | Ref. | 1.044 (0.669-1.631) | 1.357 (0.871-2.115) | 1.373 (0.883-2.134) | 0.098 | Ref. | **1.445 (1.037-2.012)** |
| Hypoproteinemia | | | | | | | | |
| n (%) | 350 (35.5) | 66 (26.9) | 88 (35.8) | 89 (36.5) | 107 (42.8) |  | 101 (28.1) | 249 (39.8) |
| Unadjusted |  | Ref. | **1.511 (1.029-2.218)** | **1.557 (1.061-2.287)** | **2.029 (1.391-2.960)** | **<0.001** | Ref. | **1.698 (1.283-2.247)** |
| Model 1 |  | Ref. | 1.365 (0.923-2.020) | 1.351 (0.910-2.008) | **1.727 (1.171-2.546)** | **0.009** | Ref. | **1.512 (1.134-2.017)** |
| Model 2 |  | Ref. | 1.319 (0.869-2.002) | 1.195 (0.781-1.829) | 1.258 (0.827-1.913) | 0.408 | Ref. | 1.219 (0.893-1.665) |
| Model 3 |  | Ref. | 1.260 (0.827-1.920) | 1.118 (0.727-1.721) | 1.202 (0.785-1.840) | 0.540 | Ref. | 1.151 (0.839-1.581) |
| Pneumonia | | | | | | | | |
| n (%) | 332 (33.7) | 77 (31.4) | 77 (31.3) | 82 (33.6) | 96 (38.4) |  | 110 (30.6) | 222 (35.5) |
| Unadjusted |  | Ref. | 0.994 (0.679-1.455) | 1.104 (0.756-1.613) | 1.360 (0.938-1.971) | 0.079 | Ref. | 1.252 (0.948-1.653) |
| Model 1 |  | Ref. | 0.875 (0.591-1.295) | 0.932 (0.628-1.382) | 1.112 (0.755-1.636) | 0.486 | Ref. | 1.087 (0.815-1.451) |
| Model 2 |  | Ref. | 0.780 (0.511-1.190) | 0.869 (0.567-1.333) | 0.897 (0.586-1.375) | 0.773 | Ref. | 0.940 (0.684-1.291) |
| Model 3 |  | Ref. | 0.723 (0.470-1.113) | 0.805 (0.520-1.246) | 0.856 (0.552-1.328) | 0.638 | Ref. | 0.885 (0.639-1.226) |
| DVT | | | | | | | | |
| n (%) | 330 (33.5) | 60 (24.5) | 87 (35.4) | 91 (37.3） | 92 (36.8) |  | 95 (26.4) | 235 (37.6) |
| Unadjusted |  | Ref. | **1.687 (1.141-2.495)** | **1.834 (1.242-2.709)** | **1.795 (1.218-2.647)** | **0.005** | Ref. | **1.681 (1.264-2.235)** |
| Model 1 |  | Ref. | 1.347 (0.894-2.031) | 1.318 (0.873-1.991) | 1.270 (0.842-1.915) | 0.348 | Ref. | 1.312 (0.971-1.772) |
| Model 2 |  | Ref. | 1.346 (0.879-2.059) | 1.349 (0.876-2.075) | 1.162 (0.752-1.794) | 0.620 | Ref. | 1.231 (0.896-1.692) |
| Model 3 |  | Ref. | 1.340 (0.870-2.064) | 1.359 (0.877-2.106) | 1.140 (0.731-1.776) | 0.681 | Ref. | 1.248 (0.902-1.725) |
| Electrolyte disturbance | | | | | | | | |
| n (%) | 735 (74.6) | 186 (75.9) | 185 (75.2) | 176 (72.1) | 188 (75.2) |  | 269 (74.7) | 466 (74.6) |
| Unadjusted |  | Ref. | 0.962 (0.637-1.452) | 0.821 (0.548-1.231) | 0.962 (0.638-1.449) | 0.723 | Ref. | 0.991 (0.736-1.336) |
| Model 1 |  | Ref. | 0.868 (0.571-1.320) | 0.706 (0.465-1.072) | 0.841 (0.551-1.281) | 0.331 | Ref. | 0.901 (0.663-1.224) |
| Model 2 |  | Ref. | 0.850 (0.553-1.307) | 0.686 (0.444-1.059) | 0.787 (0.506-1.225) | 0.223 | Ref. | 0.870 (0.631-1.200) |
| Model 3 |  | Ref. | 0.849 (0.549-1.311) | 0.674 (0.434-1.048) | 0.738 (0.470-1.158) | 0.135 | Ref. | 0.851 (0.613-1.181) |
| Disorders of lipoprotein metabolism | | | | | | | | |
| n (%) | 260 (26.4) | 83 (34.7) | 72 (29.3) | 61 (25.0) | 44 (17.6) |  | 117 (32.5) | 143 (22.9) |
| Unadjusted |  | Ref. | 0.808 (0.552-1.183) | **0.651 (0.439-0.963)** | **0.417 (0.274-0.634)** | **<0.001** | Ref. | **0.616 (0.462-0.823)** |
| Model 1 |  | Ref. | 0.771 (0.523-1.136) | **0.611 (0.408-0.915)** | **0.382 (0.249-0.588)** | **<0.001** | Ref. | **0.584 (0.434-0.787)** |
| Model 2 |  | Ref. | 0.805 (0.538-1.203) | **0.640 (0.420-0.976)** | **0.428 (0.272-0.673)** | **<0.001** | Ref. | **0.646 (0.473-0.884)** |
| Model 3 |  | Ref. | 0.844 (0.552-1.290) | 0.679 (0.436-1.060) | **0.467 (0.289-0.753)** | **0.001** | Ref. | 0.725 (0.520-1.009) |
| DCI | | | | | | | | |
| n (%) | 271 (27.5) | 59 (24.1) | 60 (24.4) | 68 (27.9) | 84 (33.6) |  | 82 (22.8) | 189 (30.2) |
| Unadjusted |  | Ref. | 1.017 (0.673-1.537) | 1.218 (0.812-1.826) | **1.595 (1.077-2.364)** | **0.011** | Ref. | **1.470 (1.089-1.983)** |
| Model 1 |  | Ref. | 0.970 (0.639-1.474) | 1.143 (0.755-1.730) | 1.479 (0.989-2.212) | **0.032** | Ref. | **1.396 (1.028-1.896)** |
| Model 2 |  | Ref. | 0.965 (0.627-1.487) | 1.159 (0.751-1.788) | 1.371 (0.897-2.097) | 0.092 | Ref. | 1.303 (0.944-1.799) |
| Model 3 |  | Ref. | 0.932 (0.064-1.439) | 1.114 (0.719-1.725) | 1.350 (0.878-2.076) | 0.109 | Ref. | 1.272 (0.917-1.763) |

ORs with 95% CIs were calculated using Logistic regression model.

Model 1: adjusted for age (continuous variable) and sex.

Model 2: adjusted for variables in model 1, body mass index, current smoking, current alcohol drinking, medical history (hypertension, diabetes mellitus, dyslipidemia, stroke, heart disease), WFNS , mFS, aneurysm location and treatment modality.

Model 3: adjusted for variables in model 2, plus preoperative WBC count, total cholesterol, triglyceride, high-density lipoprotein, and low-density lipoprotein.

Bold indicate statistical significance.

WFNS World Federation of Neurological Societies Scale; mFS modified Fisher Scale; WBC white blood cell; mRS modified Rankin Scale; WFNS World Federation of Neurological Societies Scale; mFS modified Fisher Scale; WBC white blood cell; mRS modified Rankin Scale; MACE major adverse cardiac event; UTI urinary tract infection; DVT deep venous thrombosis; DCI delayed cerebral ischemia;
